# Supplementary material
Source: PubMed Central journal article supplement (PMC8221915)
Supplement: mmc1.pdf [file mmc1.pdf]

# Impacto del Covid-19 en los Servicios de Traumatología

Con el objetivo de determinar en qué grado o medida ha supuesto el Covid-19 un impacto sobre nuestra especialidad, se ha desarrollado esta breve encuesta para valorar, a nivel nacional, cuáles han sido las principales similitudes y diferencias entre los diferentes centros. Se analizará el efecto sobre la actividad asistencial, en quirófano y en consulta, y también los diferentes modelos de coordinación, protección y organización propuestos. La finalidad es valorar las diferentes formas de actuación e intentar dilucidar si ha habido manejos más eficaces y/o eficientes que otros; de cara a crear áreas de mejora en previsión de un futuro rebrote.

**\*Obligatorio**

## Información para los participantes

Le proponemos participar en un estudio de investigación promovido por investigadores del Hospital Universitario de Basurto dirigido por el Dr. García de Cortázar. El estudio se denomina "Impacto del Covid-19 en los Servicios de Traumatología". Asimismo, y siguiendo los principios éticos reconocidos y la normativa legal vigente en España sobre investigación, este estudio cumple todas las exigencias legales y ha sido aprobado por el Comité de ética de la Investigación con medicamentos de Euskadi. Antes de que usted decida si va a participar o no, es importante que lea detenidamente la siguiente información. La participación en el estudio es completamente voluntaria y únicamente supondría contestar a una sencilla encuesta.

Con el objetivo de determinar en qué grado o medida ha supuesto el Covid-19 un impacto sobre nuestra especialidad, se ha desarrollado esta breve encuesta para valorar, a nivel nacional, cuáles han sido las principales similitudes y diferencias entre los diferentes centros. Se analizará el efecto sobre la actividad asistencial, en quirófano y en consulta, y también los diferentes modelos de coordinación, protección y organización propuestos. La finalidad es valorar las diferentes formas de actuación e intentar dilucidar si ha habido manejos más eficaces y/o eficientes que otros; de cara a crear áreas de mejora en previsión de un futuro rebrote.

El estudio cumple lo establecido en el REGLAMENTO (UE) 2016/679 DEL PARLAMENTO EUROPEO Y DEL CONSEJO de 27 de abril de 2016 relativo a la protección de las personas físicas en lo que respecta al tratamiento de datos personales y a la libre circulación de estos datos. Se le informa de que sus datos personales serán tratados por Osakidetza – Servicio Vasco de Salud. Se le solicita también su consentimiento para la realización de este proyecto de investigación conforme a las exigencias del Reglamento Europeo 2016/679 de Protección de Datos y a la Ley Orgánica 3/2018, de 5 de diciembre, de Protección de Datos Personales y garantía de los derechos digitales que deroga la Ley Orgánica 15/1999, de 5 de diciembre, de protección de datos personales. No se cederán datos a terceros, salvo obligación legal. Se le informa de que tiene derecho de acceso, rectificación, supresión de sus datos. Además, podrá ampliar información en materia de protección de datos en la siguiente dirección web: <http://www.osakidetza.euskadi.eus/protecciondatos>.

En todo momento se mantendrá el anonimato de los participantes y para ello, en ninguno de los documentos del estudio aparecerá su nombre, sino que le será asignado un código que será el que se utilice en todos ellos. No se le podrá identificar en ninguno de los informes escritos y publicaciones, . Sólo tendrán acceso a los datos del estudio el personal de centro que participa en él y de forma excepcional los representantes de los organismos reguladores y del comité ético con el fin de cumplir con las disposiciones legales y normativas. Los resultados del estudio siempre serán presentados de manera global y nunca de forma individualizada.

En caso de cualquier duda al respecto del estudio le rogamos se comunique con el responsable del estudio, Unai García de Cortázar Antolín, a través de la dirección de correo:

Unai.garciadecortazarantolin@osakidetza.eus

GRACIAS POR LEER ESTA INFORMACIÓN

## Generalidades

Demografía, situación laboral, centro de trabajo

1. ¿En qué provincia desarrolla su actividad laboral? \*

*Marca solo un óvalo.*

- ☐ A Coruña
- ☐ Araba
- ☐ Albacete
- ☐ Alicante
- ☐ Almeria
- ☐ Asturias
- ☐ Ávila
- ☐ Badajoz
- ☐ Baleares
- ☐ Barcelona
- ☐ Bizkaia
- ☐ Burgos
- ☐ Cáceres
- ☐ Cádiz
- ☐ Cantabria
- ☐ Castellón
- ☐ Ceuta
- ☐ Ciudad Real
- ☐ Córdoba
- ☐ Cuenca
- ☐ Girona
- ☐ Granada
- ☐ Guadalajara
- ☐ Gipuzkoa
- ☐ Huelva
- ☐ Huesca
- ☐ Jaén
- ☐ La Rioja
- ☐ Las Palmas
- ☐ León
- ☐ Lleida
- ☐ Lugo

- ☐ Madrid
- ☐ Málaga
- ☐ Melilla
- ☐ Murcia
- ☐ Navarra
- ☐ Ourense
- ☐ Palencia
- ☐ Pontevedra
- ☐ Salamanca
- ☐ Santa Cruz de Tenerife
- ☐ Segovia
- ☐ Sevilla
- ☐ Soria
- ☐ Tarragona
- ☐ Teruel
- ☐ Toledo
- ☐ Valencia
- ☐ Valladolid
- ☐ Zamora
- ☐ Zaragoza

2. Nombre de su Centro de Trabajo \*

---

3. Código Postal de su Centro de Trabajo \*

---

4. ¿Cuántos años de experiencia tiene como Cirujano Ortopédico/Traumatólogo? \*

*Marca solo un óvalo.*

- ☐ Soy residente
- ☐ Soy adjunto hace < 5 años
- ☐ Soy adjunto hace entre 5 - 10 años
- ☐ Soy adjunto hace entre 10 - 20 años
- ☐ Soy adjunto hace más de 20 años

5. ¿Cuál es su campo de trabajo? En caso de ser residente especifique en el apartado otra, la unidad en la que estaba rotando en el momento de la pandemia (Ejemplo: Residente: unidad de ortopedia) Puede marcar una o varias respuestas.

\*

*Selecciona todos los que correspondan.*

- ☐ Unidad de Ortopedia
- ☐ Unidad de Traumatología
- ☐ Unidad de Ortopedia Infantil
- ☐ Unidad de Tumores
- ☐ Unidad de Patología Séptica

Otro: ☐ \_\_\_\_\_

6. ¿En qué tipo de Centro trabaja? \*

*Marca solo un óvalo.*

- ☐ Hospital de Primer Nivel
- ☐ Hospital de Segundo Nivel
- ☐ Hospital de Tercer Nivel
- ☐ Otro: \_\_\_\_\_

7. En su centro, ¿de quién depende el cuidado del paciente crítico? \*

*Marca solo un óvalo.*

- ☐ Anestesia
- ☐ Intensivos
- ☐ Otro: \_\_\_\_\_

#### Impacto de Covid-19 en su actividad asistencial

8. Antes del periodo de pandemia Covid-19, ¿de cuántos días de quirófano disponía a la semana? \*

*Marca solo un óvalo.*

- ☐ Ninguno o uno
- ☐ Uno o dos
- ☐ Dos o más
- ☐ Otro: \_\_\_\_\_

9. Durante el periodo de pandemia Covid-19, ¿de cuántos días de quirófano ha dispuesto a la semana? \*

*Marca solo un óvalo.*

- ☐ Más quirófanos que previo a la pandemia
- ☐ La misma cantidad que previo a la pandemia
- ☐ Una reducción de entre el 25% y el 50%
- ☐ Una reducción de más del 50%
- ☐ Se ha detenido mi actividad quirúrgica
- ☐ Otro: \_\_\_\_\_

10. Durante el periodo de pandemia Covid-19, ¿en qué grado se han visto alterados los quirófanos para todo su servicio? \*

*Marca solo un óvalo.*

- ☐ Más quirófanos que previo a la pandemia
- ☐ La misma cantidad que previo a la pandemia
- ☐ Una reducción de entre el 25% y el 50%
- ☐ Una reducción de más del 50%
- ☐ Se ha detenido la actividad quirúrgica
- ☐ Otro: \_\_\_\_\_

11. Antes de el periodo de pandemia Covid-19, ¿de cuántos días de consulta presencial disponía a la semana? \*

*Marca solo un óvalo.*

- ☐ Ninguno o uno
- ☐ Uno o dos
- ☐ Dos o más
- ☐ Otro: \_\_\_\_\_

12. Durante el periodo de pandemia Covid-19, ¿de cuántos días de consulta presencial ha dispuesto a la semana? \*

*Marca solo un óvalo.*

- ☐ Más consultas presenciales que previo a la pandemia
- ☐ Las mismas consultas presenciales que previo a la pandemia
- ☐ He sustituido mis consultas presenciales por consultas telefónicas dejando únicamente presenciales las que requerían de un seguimiento obligatorio
- ☐ He sustituido mis consultas presenciales por consultas telefónicas en todos los casos
- ☐ He anulado mis consultas
- ☐ Otro: \_\_\_\_\_

13. ¿Ha sido requerido, durante el periodo de pandemia, para colaborar con servicios ajenos al suyo? \*

*Marca solo un óvalo.*

- ☐ Sí, he tenido que atender pacientes en urgencias generales (Covid-19 y no Covid-19)
- ☐ Sí, he tenido que atender pacientes de urgencias traumatológicas (válido para centros donde se trabaja de guardia de segunda llamada)
- ☐ Sí, he tenido que atender pacientes en UCI (afectos de Covid-19)
- ☐ Sí, he tenido que atender pacientes con patología respiratoria Covid-19, en plantas de hospitalización
- ☐ No, no he sido requerido para ninguna actividad ajena a mi servicio
- ☐ Otro: \_\_\_\_\_

14. ¿Cree que su aportación durante la pandemia podría haber sido de más utilidad? \*

*Marca solo un óvalo.*

- ☐ No, creo que he ayudado en la medida de mis posibilidades
- ☐ No, creo que mi aportación ha sido superior incluso a mis expectativas previas
- ☐ Sí, creo que se ha infrautilizado mi posible aportación dentro de mi servicio
- ☐ Sí, creo que se ha infrautilizado mi posible aportación para con los enfermos Covid-19
- ☐ Otro: \_\_\_\_\_

15. ¿Ha visto reducidas las horas de su actividad semanal? Puede marcar una o varias respuestas. \*

*Selecciona todos los que correspondan.*

- ☐ No, he trabajado las mismas o más horas
- ☐ Sí, por una política de disminución de riesgo de contagio
- ☐ Sí, por falta de actividad en mi Servicio

Otro: ☐ \_\_\_\_\_

16. ¿Ha habido una reestructuración en su Servicio durante la época de pandemia Covid-19? Puede marcar una o varias respuestas. \*

*Selecciona todos los que correspondan.*

- ☐ No, todo el Servicio ha permanecido con el mismo personal
- ☐ Sí, se han denegado permisos y reducciones de jornada
- ☐ Sí, ha habido nuevas contrataciones
- ☐ Sí, ha habido bajas por no prorrogar contratos por el periodo de pandemia

Otro: ☐ \_\_\_\_\_

### Actividad quirúrgica durante la pandemia

17. Durante el periodo de pandemia, ¿qué intervenciones quirúrgicas se han realizado en su centro? Puede marcar una o varias respuestas. \*

*Selecciona todos los que correspondan.*

- ☐ No se ha modificado la actividad
- ☐ Se han intervenido urgencias
- ☐ Se han intervenido fracturas
- ☐ Se han intervenido infecciones
- ☐ Se ha intervenido ortopedia
- ☐ Se han intervenido tumores

Otro: ☐ \_\_\_\_\_

18. En cuanto a las indicaciones quirúrgicas de las fracturas, ¿ha habido una modificación de las mismas en este periodo? \*

*Marca solo un óvalo.*

- ☐ No, se ha indicado tratamiento quirúrgico o conservador igual que previamente a la pandemia
- ☐ Sí, se ha indicado más tratamiento conservador que previamente a la pandemia
- ☐ Sí, se ha indicado más tratamiento quirúrgico que previamente a la pandemia
- ☐ Otro: \_\_\_\_\_

19. En el caso de que se haya indicado más tratamiento conservador, ¿Cuál ha sido el motivo? Puede marcar una o varias respuestas. \*

*Selecciona todos los que correspondan.*

- ☐ Ausencia de medios humanos (Traumatología, Anestesia, Enfermería...)
- ☐ Ausencia de medios físicos (Quirófanos, URPA, Reanimación...)
- ☐ Ausencia de camas de ingreso (o evitar ocupación de las mismas)
- ☐ Evitar el riesgo de contagio que supone ingresar pacientes no Covid

Otro: ☐ \_\_\_\_\_

20. ¿Se han realizado derivaciones de pacientes a otros centros con el objetivo de poder intervenirlos de manera más segura? Puede marcar una o varias respuestas. \*

*Selecciona todos los que correspondan.*

- ☐ Sí, se ha realizado un circuito de derivación para pacientes afectos de fracturas
- ☐ Sí, se ha realizado un circuito de derivación para pacientes afectos de infecciones
- ☐ Sí, se ha realizado un circuito de derivación para pacientes afectos de tumores
- ☐ No, se han intervenido todos los pacientes en mi centro

21. ¿Se ha realizado en su centro un circuito específico para intervenir pacientes Covid-19? \*

*Marca solo un óvalo.*

- ☐ No, se han intervenido pacientes Covid-19 y no Covid-19 en los mismos quirófanos
- ☐ Sí, se han intervenido pacientes Covid-19 y no Covid-19 en quirófanos separados
- ☐ Sí, se han intervenido pacientes Covid-19 en un centro y los no Covid-19 se han derivado a otro centro distinto
- ☐ Otro: \_\_\_\_\_

22. En caso de tener que intervenir de manera URGENTE a un paciente asintomático para Covid-19 en su centro, ¿cuáles han sido las pruebas necesarias para el despistaje de Covid-19? Puede marcar una o varias respuestas. \*

*Selecciona todos los que correspondan.*

- ☐ PCR  
☐ Anticuerpos  
☐ Rx de tórax  
☐ TAC torácico

Otro: ☐ \_\_\_\_\_

23. En caso de tener que intervenir de manera PROGRAMADA a un paciente asintomático para Covid-19 en su centro, ¿cuáles han sido las pruebas necesarias para el despistaje de Covid-19? Puede marcar una o varias respuestas. \*

*Selecciona todos los que correspondan.*

- ☐ PCR  
☐ Anticuerpos  
☐ Rx de tórax  
☐ TAC torácico

Otro: ☐ \_\_\_\_\_

### Coordinación, organización y protección

24. En líneas generales, ¿cómo de satisfecho está con la coordinación de la pandemia dentro de su Servicio? \*

*Marca solo un óvalo.*

|                 |                       |                       |                       |                       |                       |                |
|-----------------|-----------------------|-----------------------|-----------------------|-----------------------|-----------------------|----------------|
|                 | 1                     | 2                     | 3                     | 4                     | 5                     |                |
| Nada satisfecho | <input type="radio"/> | Muy satisfecho |

25. En líneas generales, ¿cómo de satisfecho está con la coordinación de la pandemia dentro de su hospital? \*

*Marca solo un óvalo.*

|                 |                       |                       |                       |                       |                       |                |
|-----------------|-----------------------|-----------------------|-----------------------|-----------------------|-----------------------|----------------|
|                 | <b>1</b>              | <b>2</b>              | <b>3</b>              | <b>4</b>              | <b>5</b>              |                |
| Nada satisfecho | <input type="radio"/> | Muy satisfecho |

26. En líneas generales, ¿cómo de satisfecho está con la coordinación de la pandemia dentro de su provincia? \*

*Marca solo un óvalo.*

|                 |                       |                       |                       |                       |                       |                |
|-----------------|-----------------------|-----------------------|-----------------------|-----------------------|-----------------------|----------------|
|                 | 1                     | 2                     | 3                     | 4                     | 5                     |                |
| Nada satisfecho | <input type="radio"/> | Muy satisfecho |

27. En líneas generales, ¿cómo de satisfecho está con la coordinación de la pandemia en el Estado? \*

*Marca solo un óvalo.*

|                 |                       |                       |                       |                       |                       |                |
|-----------------|-----------------------|-----------------------|-----------------------|-----------------------|-----------------------|----------------|
|                 | 1                     | 2                     | 3                     | 4                     | 5                     |                |
| Nada satisfecho | <input type="radio"/> | Muy satisfecho |

28. ¿Considera que los equipos de protección de los que ha dispuesto han sido los necesarios para desempeñar su trabajo de forma segura? \*

*Marca solo un óvalo.*

- ☐ Sí, he dispuesto de mascarillas de alta protección, gafas, EPIs cuando era necesario... sin ningún tipo de problema o restricción
- ☐ Sí, he dispuesto de mascarillas de alta protección, gafas, EPIs... pero de manera muy controlada y vigilada
- ☐ No, únicamente disponíamos de un número limitado de equipos de protección para todo el Servicio
- ☐ No, disponíamos únicamente de mascarillas de alta protección de manera controlada pero constante. El resto de sistemas de protección no daban abasto con las necesidades del Servicio
- ☐ No, disponíamos de muy escasos equipos de protección que no daban abasto con las necesidades del Servicio
- ☐ No, se nos negaron equipos de protección por no considerarse Traumatología un Servicio expuesto a la fuente de contagio
- ☐ Otro: \_\_\_\_\_

29. ¿En algún caso se le ha denegado un equipo de protección para explorar/tratar a un paciente sospecha o Covid-19 positivo? \*

*Marca solo un óvalo.*

- ☐ Sí
- ☐ No

30. En caso afirmativo, ¿Qué se le ha denegado? Puede marcar una o varias respuestas. \*

*Selecciona todos los que correspondan.*

- ☐ Mascarilla de protección
- ☐ Gafas de protección
- ☐ Pantalla de protección
- ☐ EPI
- ☐ Guantes

Otro: ☐ \_\_\_\_\_

31. ¿En caso de respuesta afirmativa, cuales han sido los motivos que se les han dado?

---

32. ¿Qué porcentaje de profesionales de su Servicio ha estado afectado por Covid-19? \*

*Marca solo un óvalo.*

- ☐ <10%
- ☐ 10 - 30%
- ☐ 30 - 50%
- ☐ > 50%
- ☐ No sabe/No contesta

33. Cree que la causa de infección de la mayoría de profesionales de su Servicio se debe a... (Puede marcar una o varias respuestas) \*

*Selecciona todos los que correspondan.*

- ☐ Infección adquirida en la comunidad
- ☐ Sobreexposición en el puesto de trabajo a pesar de equipos de protección adecuados
- ☐ Exposición en el puesto de trabajo con equipos de protección NO adecuados
- ☐ Exposición entre compañeros con equipos de protección NO adecuados
- ☐ No sabe/No contesta

Otro: ☐ \_\_\_\_\_

34. ¿Ha habido en su Servicio algún sistema para evitar que compañeros de grupos de riesgo estén expuestos a una posible infección por Covid-19? Puede marcar una o varias respuestas. \*

*Selecciona todos los que correspondan.*

- ☐ No, todo el Servicio ha trabajado por igual
- ☐ Sí, se ha limitado la actividad a partir de cierta edad (mayores de 50-55 años)
- ☐ Sí, se ha limitado la actividad por comorbilidad

Otro: ☐ \_\_\_\_\_

35. ¿Qué grado de satisfacción tiene en cuanto a la formación recibida en los siguientes campos? \*

*Marca solo un óvalo por fila.*

|                                                                                | Nada<br>satisfecho    | Poco<br>satisfecho    | Satisfecho            | Muy<br>satisfecho     |
|--------------------------------------------------------------------------------|-----------------------|-----------------------|-----------------------|-----------------------|
| Mascarilla de protección: qué tipo utilizar en cada momento, número de usos... | <input type="radio"/> | <input type="radio"/> | <input type="radio"/> | <input type="radio"/> |
| EPIs: cómo y cuándo usarlos                                                    | <input type="radio"/> | <input type="radio"/> | <input type="radio"/> | <input type="radio"/> |
| Toma de muestras Covid-19                                                      | <input type="radio"/> | <input type="radio"/> | <input type="radio"/> | <input type="radio"/> |
| Higiene y medidas de prevención físicas (lavado de manos, uso de pijamas...)   | <input type="radio"/> | <input type="radio"/> | <input type="radio"/> | <input type="radio"/> |
| Actuación en quirófano con pacientes Covid-19 positivo                         | <input type="radio"/> | <input type="radio"/> | <input type="radio"/> | <input type="radio"/> |

36. ¿Considera que la pandemia va a variar la forma de actuación para con nuestra Especialidad? Puede marcar una o varias respuestas. \*

*Selecciona todos los que correspondan.*

- ☐ No, creo que nuestra actividad seguirá desarrollándose de la misma manera que previamente a la pandemia
- ☐ No, aunque llevará unos meses recuperar la normalidad
- ☐ Sí, creo que tendremos más consultas telemáticas
- ☐ Sí, creo que la actividad quirúrgica se va a ver disminuida
- ☐ Sí, creo que las indicaciones quirúrgicas en fracturas se van a ver modificadas
- ☐ Sí, creo que las indicaciones quirúrgicas en ortopedia se van a ver modificadas

Otro: ☐ \_\_\_\_\_

37. Por último, ¿modificaría de alguna manera la actuación en su Servicio en caso de un rebrote de la pandemia Covid-19?

---

---

---

---

---

---

Este contenido no ha sido creado ni aprobado por Google.

Google Formularios
